# Supplementary material for: Fast and Sensitive Determination of Cadmium and Selenium in Rice by Direct Sampling Electrothermal Vaporization Inductively Coupled Plasma Mass Spectrometry
Source: MDPI journal article supplement (doi:10.3390/molecules27238176), 2022-11-24
Supplement: s1 [file s1]

## Supporting Materials for

### Fast and sensitive determination of cadmium and selenium in rice by direct sampling electrothermal vaporization inductively coupled plasma mass spectrometry

Guanyu Lan <sup>1,2,3 †</sup>, Xue Li <sup>2,†</sup>, Hongyu Jia <sup>1,2</sup>, Xiaofeng Yu <sup>3</sup>, Zhaohui Wang <sup>1,\*</sup>, Jijun Yao <sup>3,\*</sup>, and Xuefei Mao <sup>2,\*</sup>

<sup>1</sup> Key Lab of National Soybean Industry Technology System, School of Food Science and Engineering, Jilin Agricultural University, Changchun 130118, China

<sup>2</sup> Institute of Quality Standard & Testing Technology for Agro-Products, Chinese Academy of Agricultural Sciences, Key Laboratory of Agro-food Safety and Quality, Ministry of Agriculture and Rural Affairs, Beijing 100081, China

<sup>3</sup> Hangzhou Puyu Technology Co. Ltd., Hangzhou, Zhejiang 311300, China

\* Correspondence: wzhlindsp@aliyun.com (Z.W.); jijun\_yao@fpi-inc.com (J.Y.); mxmf08@163.com or maouxuefei@caas.cn (X.M.)

† These authors contributed equally to this work.

**Table S-1 Microwave digestion program**

| Program | Temperature (°C) | Holding time (min) |
|---------|------------------|--------------------|
| 5       | 150              | 3                  |
| 5       | 200              | 3                  |
| 8       | 240              | 30                 |

**Table S-2 Instrumental conditions and parameters of ICP-MS**

| Instrument parameters                         | Setting value                                           |
|-----------------------------------------------|---------------------------------------------------------|
| RF power/ (W)                                 | 1400                                                    |
| Nebulization gas flow/ (L min <sup>-1</sup> ) | 1.180                                                   |
| Auxiliary gas flow/ (L min <sup>-1</sup> )    | 1.00                                                    |
| Cooling gas flow/ (L min <sup>-1</sup> )      | 14.00                                                   |
| Sampling depth/ (mm)                          | 2                                                       |
| Sampling cone/interception cone               | Ni/Cu                                                   |
| Scanning times                                | 10                                                      |
| Dwell time/ (ms)                              | 10                                                      |
| Scan mode                                     | peak hopping scan                                       |
| Collision gas                                 | He                                                      |
| Collision gas flow / (mL min <sup>-1</sup> )  | 1.25                                                    |
| Isotope                                       | <sup>111</sup> Cd、 <sup>82</sup> Se                     |
| Internal standard                             | <sup>45</sup> Sc、 <sup>103</sup> Rh、 <sup>115</sup> In、 |
|                                               | <sup>185</sup> Re、 <sup>209</sup> Bi                    |

**Table S-3 Heating program of DS-ETV for Cd and Se**

| ID | ETV                 | Heating<br>time (s) | Holding<br>time (s) | Carrier gas                     | Bypass gas                      | Reading |
|----|---------------------|---------------------|---------------------|---------------------------------|---------------------------------|---------|
|    | temperature<br>(°C) |                     |                     | flow (mL<br>min <sup>-1</sup> ) | flow (mL<br>min <sup>-1</sup> ) |         |
| 1  | 100                 | 5                   | 2                   | 500                             | 600                             | √       |
| 2  | 200                 | 5                   | 2                   | 500                             | 600                             | √       |
| 3  | 300                 | 5                   | 2                   | 500                             | 600                             | √       |

|    |      |   |   |     |     |   |
|----|------|---|---|-----|-----|---|
| 4  | 400  | 5 | 2 | 500 | 600 | √ |
| 5  | 500  | 5 | 2 | 500 | 600 | √ |
| 6  | 600  | 5 | 2 | 500 | 600 | √ |
| 7  | 700  | 5 | 2 | 500 | 600 | √ |
| 8  | 800  | 5 | 2 | 500 | 600 | √ |
| 9  | 1200 | 5 | 2 | 500 | 600 | √ |
| 10 | 1600 | 5 | 2 | 500 | 600 | √ |
| 11 | 2000 | 5 | 2 | 500 | 600 | √ |

**Table S-4 Sample information of rice**

| Sample | Place of production  | Variety              |
|--------|----------------------|----------------------|
| THX    | Changsha, Hunan      | <i>Indica</i> rice   |
| JS     | Hengyang, Hunan      | <i>Japonica</i> rice |
| ZS     | Enshi, Hubei         | <i>Indica</i> rice   |
| QY     | Enshi, Hubei         | <i>Indica</i> rice   |
| HN-1   | Changsha, Hunan      | <i>Indica</i> rice   |
| HN-2   | Changsha, Hunan      | <i>Japonica</i> rice |
| FZ     | Harbin, Heilongjiang | <i>Japonica</i> rice |

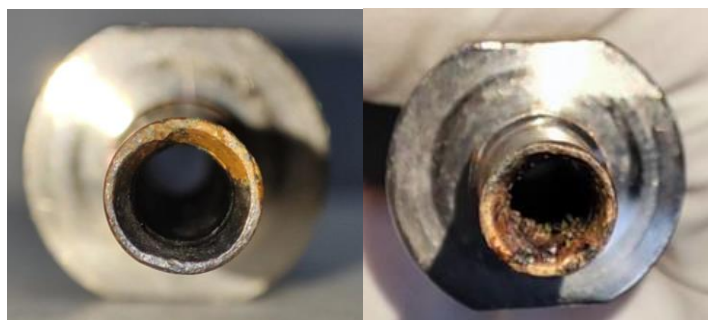

**Figure S1 Effect of bypass gas on residual deposition on the pagoda joint.** The picture on the left shows the pagoda joint with bypass gas after sampling 50 replicates, and the inner wall is smooth and there is no obvious residual deposition. The picture on the right shows the pagoda joint without bypass gas after sampling 50 replicates, and the residual deposition was obviously found.

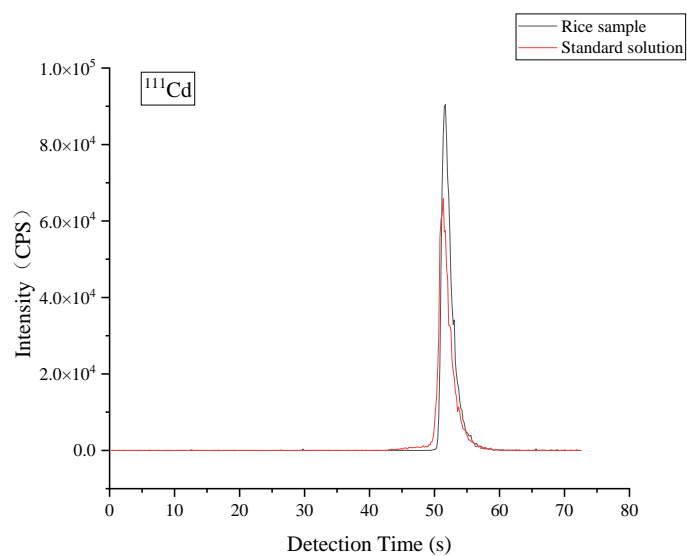

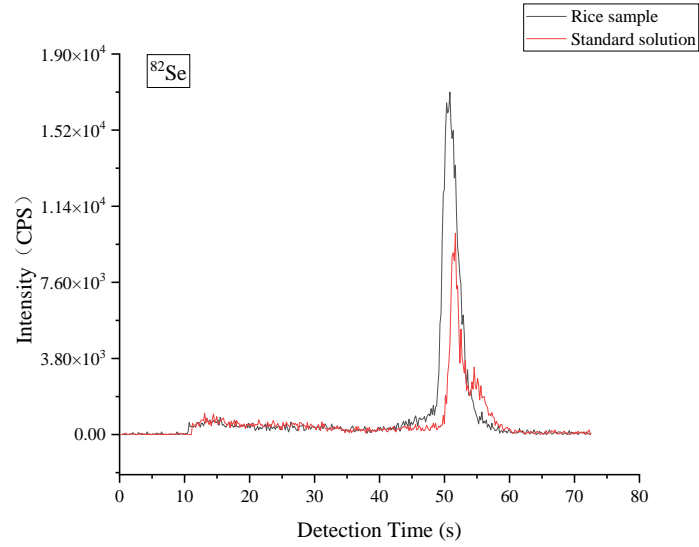

**Figure S2 The signal intensities of Cd and Se in real rice samples vs. standard solution.** The operational parameters were consistent with **Table 3**. For black line, a rice sample (GBW10010a,  $\text{Cd} = 53 \pm 4 \text{ ng g}^{-1}$  and  $\text{Se} = 36 \pm 8 \text{ ng g}^{-1}$ ) was employed for slurry sampling. For red line, the rice sample was replaced with a standard solution of  $53 \text{ ng L}^{-1}$  Cd and  $36 \text{ ng L}^{-1}$  Se; and then  $10 \mu\text{L}$  of slurry aliquot prepared was introduced into the ETV for measurement.

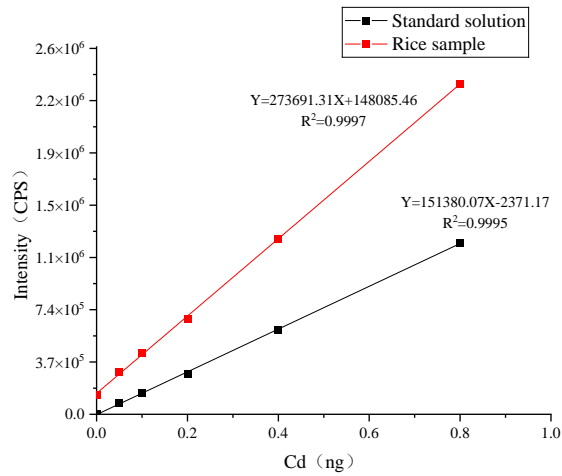

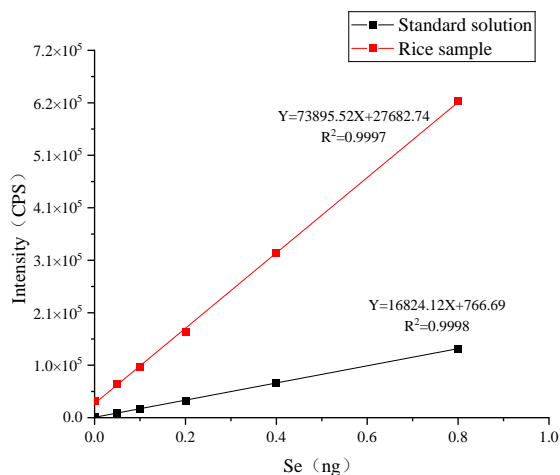

**Figure S3 The calibration curves of Cd and Se with standard addition vs. standard solution.** The operational parameters were consistent with **Table 3**. For the standard addition method, a rice sample (GBW10010a, Cd =  $53 \pm 4$  ng g<sup>-1</sup> and Se =  $36 \pm 8$  ng g<sup>-1</sup>) was employed for slurry sampling and spiked by 0.05, 0.1, 0.2, 0.4 and 0.8 ng of Cd or Se. For the standard solution method, 0.05, 0.1, 0.2, 0.4 and 0.8 ng Cd or Se were introduced into the ETV for measurement using 10  $\mu$ L standard solution.

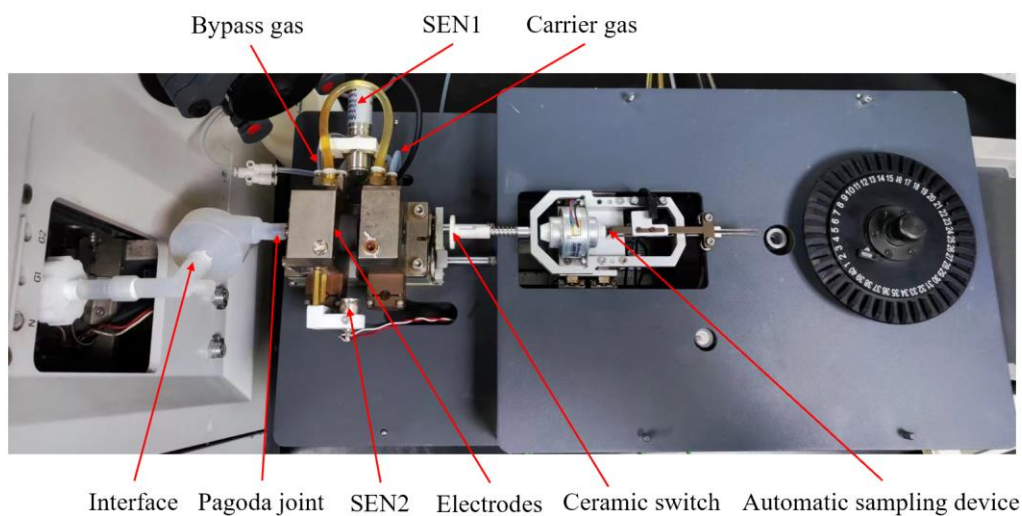

**Figure S4 Picture of DS-ETV-ICP-MS instrumentation.** SEN1 and SEN2 refer to the photoelectric sensor and infrared sensor, respectively. SSD refers to the signal delay device.
